# Supplementary material for: Synthesis and application of a 0D/2D nanocomposite for the nanomolar level detection of an antiandrogen drug
Source: Royal Society of Chemistry journal article supplement (doi:10.1039/d2nj01967a), 2022-01-01
Supplement: d2nj01967a1.pdf [file d2nj01967a1.pdf]

## Synthesis and application of 0D/2D nanocomposite for the nanomolar level detection of antiandrogen drug

Santhosh A S<sup>\*a</sup>, Sahana K M<sup>b</sup>, Sandeep S<sup>\*b</sup>, Prashanth Kumar P N<sup>c</sup>, Norah Salem Alsaiani<sup>d</sup>, Khadijah Mohammedsaleh Katubi<sup>d</sup>, Khamael M Abualnaja<sup>e</sup>, J R Rajabathar<sup>f</sup>.

<sup>a</sup> UG Department of Chemistry, NMKRV College for Women, Jayanagara, Bengaluru.

<sup>b</sup> Department of Chemistry, SJCE, JSS Science and Technology University, Mysuru.

<sup>c</sup> Department of Chemistry, DRM Science College, Davanagere.

<sup>d</sup> Department of Chemistry, College of Science, Princess Nourah bint Abdulrahman University, Riyadh, Saudi Arabia.

<sup>e</sup> Department of Chemistry, College of Science, Taif University, Taif, Saudi Arabia.

<sup>f</sup> Surfactant Research Chair, Department of Chemistry, King Saud University, Riyadh, Saudi Arabia.

Corresponding authors: [santhu41100@gmail.com](mailto:santhu41100@gmail.com) , [sandeep12chem@gmail.com](mailto:sandeep12chem@gmail.com)

### Supplementary Data

Fig S1

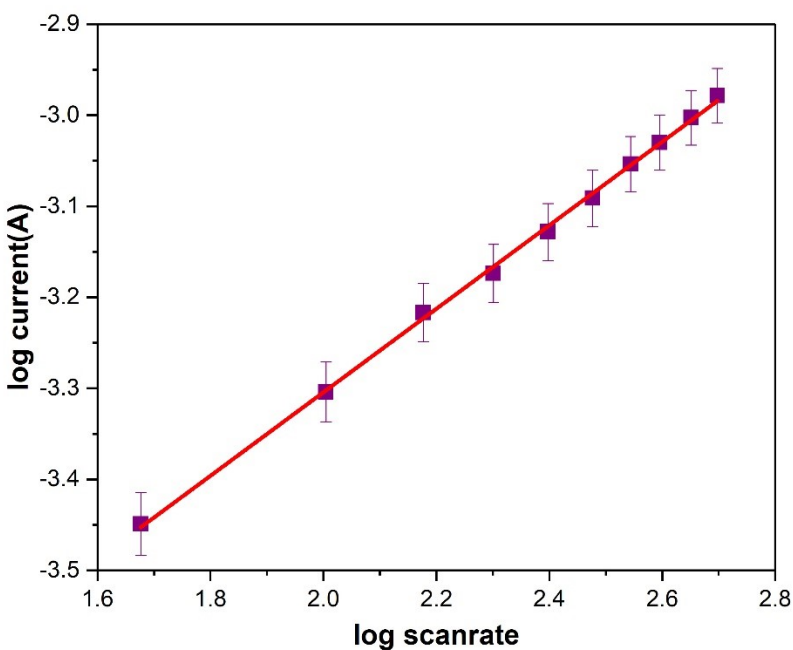

Fig S1 Plot of log scan rate vs log current.

Fig S2

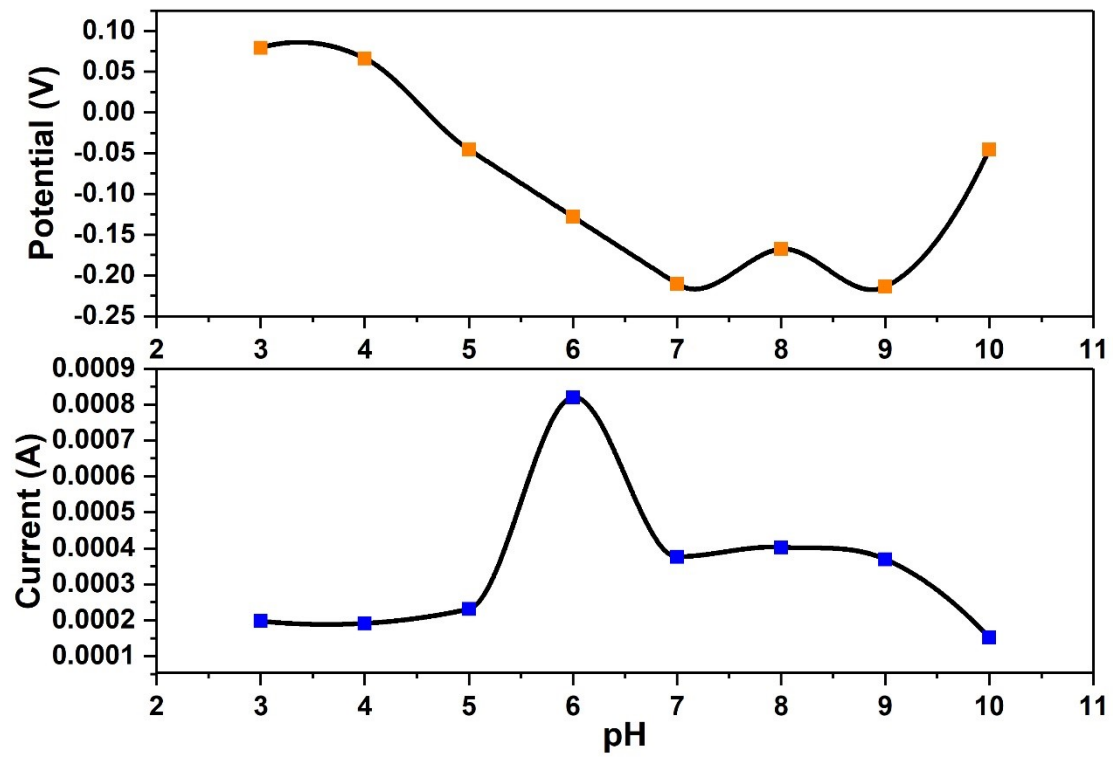

Fig S2 Plot of pH vs potential and pH vs current
